# Supplementary material
Source: publisher figshare collection journal article supplement (https://acs.figshare.com/ndownloader/files/22179150)
Supplement: Supplementary file 1 [file 22179150]

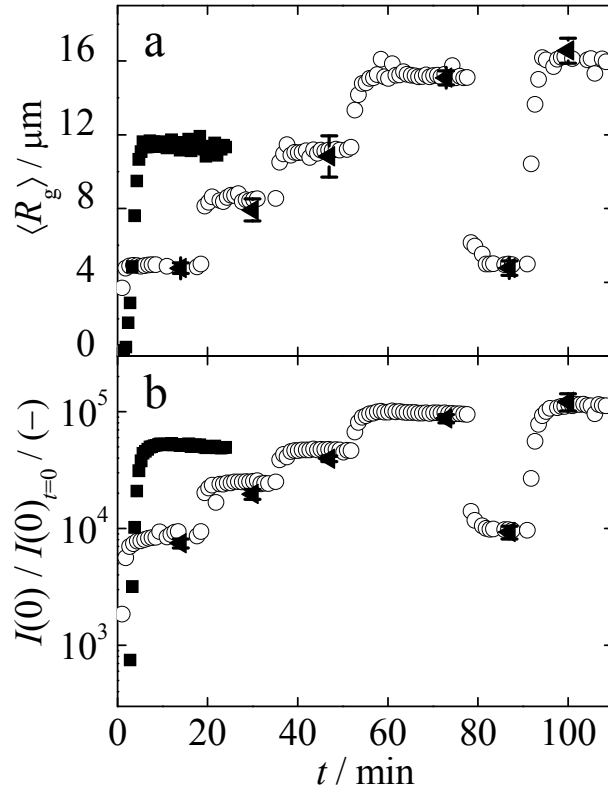

Figure SI1. Examples of the time evolution of (a) the rms radius of gyration,  $\langle R_g \rangle$ , and (b) the normalized zero-angle intensity,  $I(0)/I(0)_{t=0}$ , during step changes of the volume average shear rate,  $\langle G \rangle$ , through a change in rotation speed, measured for a solid volume fraction equal to  $2 \times 10^{-5}$  and a primary particle diameter of 120 nm; (○) the volume average shear rate was changed in the following manner:  $\langle G \rangle = 1097 - 517 - 287 - 106 - 1097 - 106 \text{ s}^{-1}$ ; (■)  $\langle G \rangle = 287 \text{ s}^{-1}$ ; (○, ■) loop measurement, (◄) validation measurements (syringe).

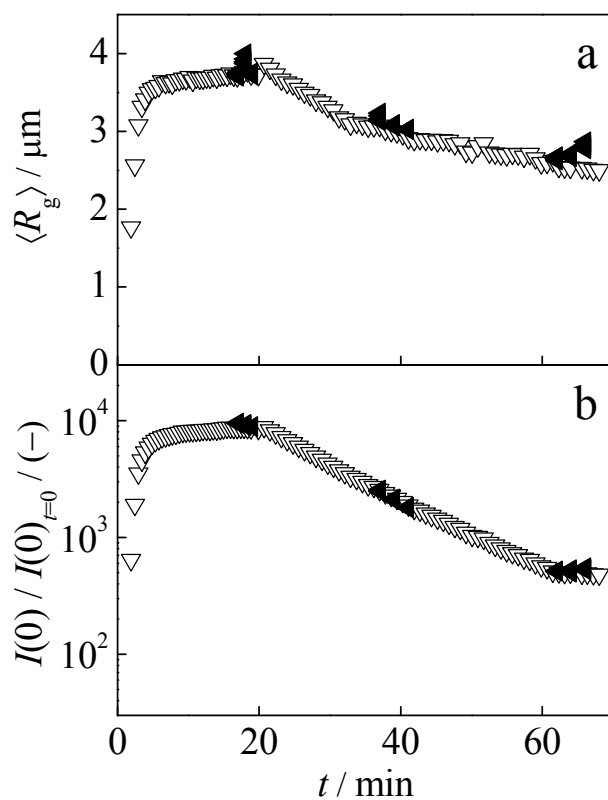

Figure SI2. Example of the time evolution of the (a) the rms radius of gyration,  $\langle R_g \rangle$ , and (b) the normalized zero-angle intensity,  $I(0)/I(0)_{t=0}$ , for a primary particle diameter of 120 nm during a dilution experiment, measured for a volume average shear rate equal to  $869 \text{ s}^{-1}$  and an initial solid volume fraction equal to  $2 \times 10^{-5}$ : ( $\circ$ ) loop measurement, ( $\blacktriangle$ ) validation measurements (syringe).

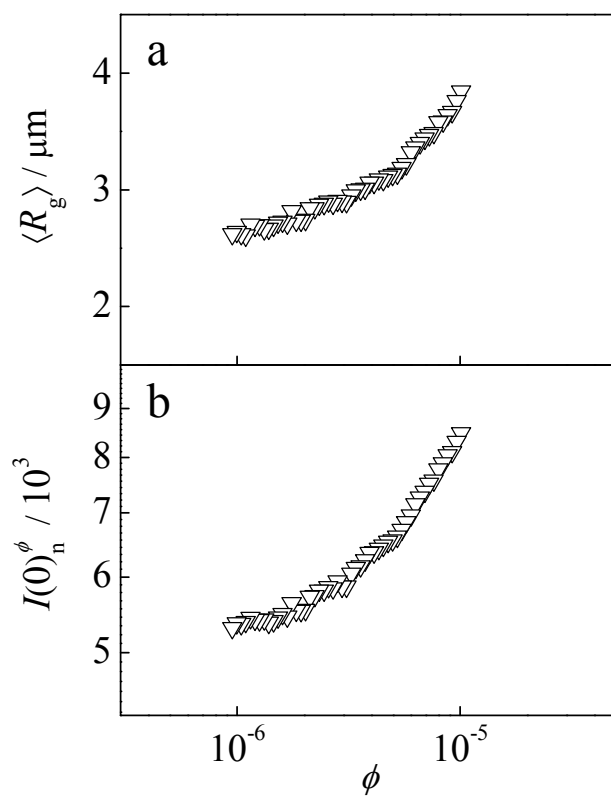

Figure SI3. (a) Rms radius of gyration,  $\langle R_g \rangle$ , and (b)  $\phi$ -normalized zero-angle intensity,  $I(0)_n^\phi$ , as a function of the solid volume fraction,  $\phi$ , for a primary particle diameter of 120 nm during a dilution experiment, measured for a volume average shear rate equal to  $869 \text{ s}^{-1}$  and an initial solid volume fraction equal to  $2 \times 10^{-5}$ .
